# Supplementary material for: Personality, cognition and behavior in chimpanzees: a new approach based on Eysenck’s model
Source: PeerJ. 2020 Aug 17;8:e9707. doi: 10.7717/peerj.9707 (PMC7439959; doi:10.7717/peerj.9707)
Supplement: Data S1 [file peerj-08-9707-s002.xlsx]

## Sheet: Raw data cognitive tasks
subject	participation	success	latency	freqdrop	PENextraversion	PENneuroticism	PENdominance	sex	age	complexity	information	trial	task	boxcolor	boxorder	subject.number	session
AF	1	1	3	0	56.41	59.58	54.44	female	10	1	2	1	4	1	1	1	1
AF	1	1	2	0	56.41	59.58	54.44	female	10	1	2	2	4	1	1	1	1
AF	1	1	5	0	56.41	59.58	54.44	female	10	1	2	3	4	1	1	1	1
AF	1	1	2	0	56.41	59.58	54.44	female	10	1	2	4	4	1	1	1	1
AF	1	1	5	0	56.41	59.58	54.44	female	10	1	2	1	4	2	1	1	2
AF	1	1	8	0	56.41	59.58	54.44	female	10	1	2	2	4	2	1	1	2
AF	1	1	3	0	56.41	59.58	54.44	female	10	1	2	3	4	2	1	1	2
AF	1	1	2	0	56.41	59.58	54.44	female	10	1	2	4	4	2	1	1	2
AF	1	1	71	0	56.41	59.58	54.44	female	10	1	1	1	2	1	1	1	1
AF	1	0		0	56.41	59.58	54.44	female	10	1	1	2	2	1	1	1	1
AF	1	1	10	0	56.41	59.58	54.44	female	10	1	1	3	2	1	1	1	1
AF	1	1	7	0	56.41	59.58	54.44	female	10	1	1	4	2	1	1	1	1
AF	1	0		0	56.41	59.58	54.44	female	10	1	1	1	2	2	1	1	2
AF	1	1	3	0	56.41	59.58	54.44	female	10	1	1	2	2	2	1	1	2
AF	1	1	11	0	56.41	59.58	54.44	female	10	1	1	3	2	2	1	1	2
AF	1	1	3	0	56.41	59.58	54.44	female	10	1	1	4	2	2	1	1	2
AF	1	1	3	0	56.41	59.58	54.44	female	10	1	3	1	3	1	1	1	1
AF	1	1	4	0	56.41	59.58	54.44	female	10	1	3	2	3	1	1	1	1
AF	1	1	3	0	56.41	59.58	54.44	female	10	1	3	3	3	1	1	1	1
AF	1	1	3	0	56.41	59.58	54.44	female	10	1	3	4	3	1	1	1	1
AF	1	1	9	0	56.41	59.58	54.44	female	10	1	3	1	3	2	1	1	2
AF	1	1	4	0	56.41	59.58	54.44	female	10	1	3	2	3	2	1	1	2
AF	1	1	2	0	56.41	59.58	54.44	female	10	1	3	3	3	2	1	1	2
AF	1	1	1	0	56.41	59.58	54.44	female	10	1	3	4	3	2	1	1	2
BE	1	0		0	54.76	64.84	56.46	female	24	1	1	1	3	2	2	2	1
BE	1	1	16	0	54.76	64.84	56.46	female	24	1	1	2	3	2	2	2	1
BE	1	1	15	0	54.76	64.84	56.46	female	24	1	1	3	3	2	2	2	1
BE	1	0		1	54.76	64.84	56.46	female	24	1	1	4	3	2	2	2	1
BE	1	1	20	0	54.76	64.84	56.46	female	24	1	1	1	3	1	2	2	2
BE	1	1	4	0	54.76	64.84	56.46	female	24	1	1	2	3	1	2	2	2
BE	1	1	13	0	54.76	64.84	56.46	female	24	1	1	3	3	1	2	2	2
BE	1	1	9	0	54.76	64.84	56.46	female	24	1	1	4	3	1	2	2	2
BE	1	1	5	0	54.76	64.84	56.46	female	24	1	2	1	2	1	1	2	1
BE	1	1	4	0	54.76	64.84	56.46	female	24	1	2	2	2	1	1	2	1
BE	1	1	3	0	54.76	64.84	56.46	female	24	1	2	3	2	1	1	2	1
BE	1	1	2	0	54.76	64.84	56.46	female	24	1	2	4	2	1	1	2	1
BE	1	1	3	0	54.76	64.84	56.46	female	24	1	2	1	2	2	1	2	2
BE	1	1	2	0	54.76	64.84	56.46	female	24	1	2	2	2	2	1	2	2
BE	1	1	2	0	54.76	64.84	56.46	female	24	1	2	3	2	2	1	2	2
BE	1	1	2	0	54.76	64.84	56.46	female	24	1	2	4	2	2	1	2	2
BE	0				54.76	64.84	56.46	female	24	1	3	1	4	1	1	2	1
BE	0				54.76	64.84	56.46	female	24	1	3	2	4	1	1	2	1
BE	0				54.76	64.84	56.46	female	24	1	3	3	4	1	1	2	1
BE	0				54.76	64.84	56.46	female	24	1	3	4	4	1	1	2	1
BE	0				54.76	64.84	56.46	female	24	1	3	1	4	2	1	2	2
BE	0				54.76	64.84	56.46	female	24	1	3	2	4	2	1	2	2
BE	0				54.76	64.84	56.46	female	24	1	3	3	4	2	1	2	2
BE	0				54.76	64.84	56.46	female	24	1	3	4	4	2	1	2	2
BO	1	1	10	0	60.79	56.68	63.11	male	9	1	1	1	4	2	2	3	1
BO	1	1	4	0	60.79	56.68	63.11	male	9	1	1	2	4	2	2	3	1
BO	1	1	2	0	60.79	56.68	63.11	male	9	1	1	3	4	2	2	3	1
BO	1	1	9	0	60.79	56.68	63.11	male	9	1	1	4	4	2	2	3	1
BO	1	1	26	0	60.79	56.68	63.11	male	9	1	1	1	4	1	2	3	2
BO	1	1	2	0	60.79	56.68	63.11	male	9	1	1	2	4	1	2	3	2
BO	1	1	3	0	60.79	56.68	63.11	male	9	1	1	3	4	1	2	3	2
BO	1	1	1	0	60.79	56.68	63.11	male	9	1	1	4	4	1	2	3	2
BO	1	0		0	60.79	56.68	63.11	male	9	1	3	1	1	1	1	3	1
BO	1	1	11	0	60.79	56.68	63.11	male	9	1	3	2	1	1	1	3	1
BO	1	1	8	0	60.79	56.68	63.11	male	9	1	3	3	1	1	1	3	1
BO	1	1	3	0	60.79	56.68	63.11	male	9	1	3	4	1	1	1	3	1
BO	1	1	2	0	60.79	56.68	63.11	male	9	1	3	1	1	2	1	3	2
BO	1	1	9	0	60.79	56.68	63.11	male	9	1	3	2	1	2	1	3	2
BO	1	1	8	0	60.79	56.68	63.11	male	9	1	3	3	1	2	1	3	2
BO	1	1	2	0	60.79	56.68	63.11	male	9	1	3	4	1	2	1	3	2
BO	1	1	4	0	60.79	56.68	63.11	male	9	1	2	1	3	2	2	3	1
BO	1	1	3	0	60.79	56.68	63.11	male	9	1	2	2	3	2	2	3	1
BO	1	1	5	0	60.79	56.68	63.11	male	9	1	2	3	3	2	2	3	1
BO	1	1	3	0	60.79	56.68	63.11	male	9	1	2	4	3	2	2	3	1
BO	1	1	2	0	60.79	56.68	63.11	male	9	1	2	1	3	1	2	3	2
BO	1	1	8	0	60.79	56.68	63.11	male	9	1	2	2	3	1	2	3	2
BO	1	1	5	0	60.79	56.68	63.11	male	9	1	2	3	3	1	2	3	2
BO	1	1	1	0	60.79	56.68	63.11	male	9	1	2	4	3	1	2	3	2
CHA	1	1	10	0	53.16	42.47	49.81	male	20	1	1	1	1	1	1	4	1
CHA	1	1	4	0	53.16	42.47	49.81	male	20	1	1	2	1	1	1	4	1
CHA	1	1	4	0	53.16	42.47	49.81	male	20	1	1	3	1	1	1	4	1
CHA	1	1	4	0	53.16	42.47	49.81	male	20	1	1	4	1	1	1	4	1
CHA	1	1	10	0	53.16	42.47	49.81	male	20	1	1	1	1	2	1	4	2
CHA	1	1	8	0	53.16	42.47	49.81	male	20	1	1	2	1	2	1	4	2
CHA	1	1	5	0	53.16	42.47	49.81	male	20	1	1	3	1	2	1	4	2
CHA	1	1	6	0	53.16	42.47	49.81	male	20	1	1	4	1	2	1	4	2
CHA	1	1	8	0	53.16	42.47	49.81	male	20	1	3	1	2	1	1	4	1
CHA	1	1	1	0	53.16	42.47	49.81	male	20	1	3	2	2	1	1	4	1
CHA	1	1	2	0	53.16	42.47	49.81	male	20	1	3	3	2	1	1	4	1
CHA	1	1	2	0	53.16	42.47	49.81	male	20	1	3	4	2	1	1	4	1
CHA	1	1	3	0	53.16	42.47	49.81	male	20	1	3	1	2	2	1	4	2
CHA	1	1	2	0	53.16	42.47	49.81	male	20	1	3	2	2	2	1	4	2
CHA	1	1	1	0	53.16	42.47	49.81	male	20	1	3	3	2	2	1	4	2
CHA	1	1	1	0	53.16	42.47	49.81	male	20	1	3	4	2	2	1	4	2
CHA	1	1	4	0	53.16	42.47	49.81	male	20	1	2	1	4	2	2	4	1
CHA	1	1	4	0	53.16	42.47	49.81	male	20	1	2	2	4	2	2	4	1
CHA	1	1	6	0	53.16	42.47	49.81	male	20	1	2	3	4	2	2	4	1
CHA	1	1	3	0	53.16	42.47	49.81	male	20	1	2	4	4	2	2	4	1
CHA	1	1	4	0	53.16	42.47	49.81	male	20	1	2	1	4	1	2	4	2
CHA	1	1	2	0	53.16	42.47	49.81	male	20	1	2	2	4	1	2	4	2
CHA	1	1	2	0	53.16	42.47	49.81	male	20	1	2	3	4	1	2	4	2
CHA	1	1	3	0	53.16	42.47	49.81	male	20	1	2	4	4	1	2	4	2
CO	1	1	12	0	48.1	37.43	42.44	female	15	1	1	1	1	2	2	5	1
CO	1	1	4	0	48.1	37.43	42.44	female	15	1	1	2	1	2	2	5	1
CO	1	1	6	0	48.1	37.43	42.44	female	15	1	1	3	1	2	2	5	1
CO	0				48.1	37.43	42.44	female	15	1	1	4	1	2	2	5	1
CO	1	1	7	0	48.1	37.43	42.44	female	15	1	1	1	1	1	2	5	2
CO	1	1	7	0	48.1	37.43	42.44	female	15	1	1	2	1	1	2	5	2
CO	1	1	3	0	48.1	37.43	42.44	female	15	1	1	3	1	1	2	5	2
CO	1	1	7	0	48.1	37.43	42.44	female	15	1	1	4	1	1	2	5	2
CO	1	1	3	0	48.1	37.43	42.44	female	15	1	2	1	2	1	1	5	1
CO	1	1	2	0	48.1	37.43	42.44	female	15	1	2	2	2	1	1	5	1
CO	1	1	2	0	48.1	37.43	42.44	female	15	1	2	3	2	1	1	5	1
CO	1	1	3	0	48.1	37.43	42.44	female	15	1	2	4	2	1	1	5	1
CO	1	1	3	0	48.1	37.43	42.44	female	15	1	2	1	2	2	1	5	2
CO	1	1	5	0	48.1	37.43	42.44	female	15	1	2	2	2	2	1	5	2
CO	1	1	3	0	48.1	37.43	42.44	female	15	1	2	3	2	2	1	5	2
CO	1	1	2	0	48.1	37.43	42.44	female	15	1	2	4	2	2	1	5	2
CO	1	1	2	0	48.1	37.43	42.44	female	15	1	3	1	3	1	1	5	1
CO	1	1	2	0	48.1	37.43	42.44	female	15	1	3	2	3	1	1	5	1
CO	1	1	3	0	48.1	37.43	42.44	female	15	1	3	3	3	1	1	5	1
CO	1	1	2	0	48.1	37.43	42.44	female	15	1	3	4	3	1	1	5	1
CO	1	1	8	0	48.1	37.43	42.44	female	15	1	3	1	3	2	1	5	2
CO	1	1	3	0	48.1	37.43	42.44	female	15	1	3	2	3	2	1	5	2
CO	1	1	13	0	48.1	37.43	42.44	female	15	1	3	3	3	2	1	5	2
CO	0				48.1	37.43	42.44	female	15	1	3	4	3	2	1	5	2
JU	1	1	10	0	63.44	49.76	48.03	male	6	1	2	1	4	1	1	6	1
JU	1	1	3	0	63.44	49.76	48.03	male	6	1	2	2	4	1	1	6	1
JU	1	1	1	0	63.44	49.76	48.03	male	6	1	2	3	4	1	1	6	1
JU	1	1	2	0	63.44	49.76	48.03	male	6	1	2	4	4	1	1	6	1
JU	1	1	5	0	63.44	49.76	48.03	male	6	1	2	1	4	2	1	6	2
JU	1	1	2	0	63.44	49.76	48.03	male	6	1	2	2	4	2	1	6	2
JU	1	1	2	0	63.44	49.76	48.03	male	6	1	2	3	4	2	1	6	2
JU	1	1	2	0	63.44	49.76	48.03	male	6	1	2	4	4	2	1	6	2
JU	1	1	42	0	63.44	49.76	48.03	male	6	1	1	1	1	2	2	6	1
JU	1	1	3	0	63.44	49.76	48.03	male	6	1	1	2	1	2	2	6	1
JU	1	1	65	0	63.44	49.76	48.03	male	6	1	1	3	1	2	2	6	1
JU	1	1	14	0	63.44	49.76	48.03	male	6	1	1	4	1	2	2	6	1
JU	1	1	11	0	63.44	49.76	48.03	male	6	1	1	1	1	1	2	6	2
JU	1	1	64	0	63.44	49.76	48.03	male	6	1	1	2	1	1	2	6	2
JU	1	1	18	0	63.44	49.76	48.03	male	6	1	1	3	1	1	2	6	2
JU	1	1	10	0	63.44	49.76	48.03	male	6	1	1	4	1	1	2	6	2
JU	1	1	9	0	63.44	49.76	48.03	male	6	1	3	1	2	1	1	6	1
JU	1	1	13	0	63.44	49.76	48.03	male	6	1	3	2	2	1	1	6	1
JU	1	1	20	0	63.44	49.76	48.03	male	6	1	3	3	2	1	1	6	1
JU	1	1	5	0	63.44	49.76	48.03	male	6	1	3	4	2	1	1	6	1
JU	1	1	6	0	63.44	49.76	48.03	male	6	1	3	1	2	2	1	6	2
JU	1	1	26	0	63.44	49.76	48.03	male	6	1	3	2	2	2	1	6	2
JU	1	1	28	0	63.44	49.76	48.03	male	6	1	3	3	2	2	1	6	2
JU	1	1	1	0	63.44	49.76	48.03	male	6	1	3	4	2	2	1	6	2
MA	1	1	7	0	51.82	44.66	60.84	male	25	1	2	1	1	2	2	7	1
MA	1	1	6	0	51.82	44.66	60.84	male	25	1	2	2	1	2	2	7	1
MA	1	1	6	0	51.82	44.66	60.84	male	25	1	2	3	1	2	2	7	1
MA	1	1	7	0	51.82	44.66	60.84	male	25	1	2	4	1	2	2	7	1
MA	1	1	7	0	51.82	44.66	60.84	male	25	1	2	1	1	1	2	7	2
MA	1	1	6	0	51.82	44.66	60.84	male	25	1	2	2	1	1	2	7	2
MA	1	1	3	0	51.82	44.66	60.84	male	25	1	2	3	1	1	2	7	2
MA	1	1	4	0	51.82	44.66	60.84	male	25	1	2	4	1	1	2	7	2
MA	1	1	12	0	51.82	44.66	60.84	male	25	1	3	1	2	2	2	7	1
MA	1	1	8	0	51.82	44.66	60.84	male	25	1	3	2	2	2	2	7	1
MA	1	1	4	0	51.82	44.66	60.84	male	25	1	3	3	2	2	2	7	1
MA	1	1	4	0	51.82	44.66	60.84	male	25	1	3	4	2	2	2	7	1
MA	1	1	4	0	51.82	44.66	60.84	male	25	1	3	1	2	1	2	7	2
MA	1	1	3	0	51.82	44.66	60.84	male	25	1	3	2	2	1	2	7	2
MA	1	1	4	0	51.82	44.66	60.84	male	25	1	3	3	2	1	2	7	2
MA	1	1	11	0	51.82	44.66	60.84	male	25	1	3	4	2	1	2	7	2
MA	1	1	14	0	51.82	44.66	60.84	male	25	1	1	1	3	2	2	7	1
MA	1	1	9	0	51.82	44.66	60.84	male	25	1	1	2	3	2	2	7	1
MA	1	1	11	0	51.82	44.66	60.84	male	25	1	1	3	3	2	2	7	1
MA	1	1	12	0	51.82	44.66	60.84	male	25	1	1	4	3	2	2	7	1
MA	1	1	12	0	51.82	44.66	60.84	male	25	1	1	1	3	1	2	7	2
MA	1	1	3	0	51.82	44.66	60.84	male	25	1	1	2	3	1	2	7	2
MA	1	1	6	0	51.82	44.66	60.84	male	25	1	1	3	3	1	2	7	2
MA	1	1	8	0	51.82	44.66	60.84	male	25	1	1	4	3	1	2	7	2
NI	1	1	11	0	56.1	35.17	38.79	male	8	1	3	1	4	2	2	8	1
NI	1	1	3	0	56.1	35.17	38.79	male	8	1	3	2	4	2	2	8	1
NI	1	1	2	0	56.1	35.17	38.79	male	8	1	3	3	4	2	2	8	1
NI	1	1	2	0	56.1	35.17	38.79	male	8	1	3	4	4	2	2	8	1
NI	1	1	2	0	56.1	35.17	38.79	male	8	1	3	1	4	1	2	8	2
NI	1	1	2	0	56.1	35.17	38.79	male	8	1	3	2	4	1	2	8	2
NI	1	1	2	0	56.1	35.17	38.79	male	8	1	3	3	4	1	2	8	2
NI	1	1	2	0	56.1	35.17	38.79	male	8	1	3	4	4	1	2	8	2
NI	1	0		0	56.1	35.17	38.79	male	8	1	2	1	1	1	1	8	1
NI	1	1	6	0	56.1	35.17	38.79	male	8	1	2	2	1	1	1	8	1
NI	1	1	16	0	56.1	35.17	38.79	male	8	1	2	3	1	1	1	8	1
NI	1	1	4	0	56.1	35.17	38.79	male	8	1	2	4	1	1	1	8	1
NI	1	1	4	0	56.1	35.17	38.79	male	8	1	2	1	1	2	1	8	2
NI	1	1	4	0	56.1	35.17	38.79	male	8	1	2	2	1	2	1	8	2
NI	1	1	19	0	56.1	35.17	38.79	male	8	1	2	3	1	2	1	8	2
NI	1	1	17	0	56.1	35.17	38.79	male	8	1	2	4	1	2	1	8	2
NI	1	1	27	0	56.1	35.17	38.79	male	8	1	1	1	3	1	1	8	1
NI	1	1	7	0	56.1	35.17	38.79	male	8	1	1	2	3	1	1	8	1
NI	1	1	5	0	56.1	35.17	38.79	male	8	1	1	3	3	1	1	8	1
NI	1	1	7	0	56.1	35.17	38.79	male	8	1	1	4	3	1	1	8	1
NI	1	1	18	0	56.1	35.17	38.79	male	8	1	1	1	3	2	1	8	2
NI	1	1	7	0	56.1	35.17	38.79	male	8	1	1	2	3	2	1	8	2
NI	1	1	8	0	56.1	35.17	38.79	male	8	1	1	3	3	2	1	8	2
NI	1	1	11	0	56.1	35.17	38.79	male	8	1	1	4	3	2	1	8	2
TI	1	1	8	0	22.02	49.92	37.9	male	22	1	3	1	4	1	1	9	1
TI	1	1	10	0	22.02	49.92	37.9	male	22	1	3	2	4	1	1	9	1
TI	1	1	3	0	22.02	49.92	37.9	male	22	1	3	3	4	1	1	9	1
TI	1	1	5	0	22.02	49.92	37.9	male	22	1	3	4	4	1	1	9	1
TI	0				22.02	49.92	37.9	male	22	1	3	1	4	2	1	9	2
TI	0				22.02	49.92	37.9	male	22	1	3	2	4	2	1	9	2
TI	0				22.02	49.92	37.9	male	22	1	3	3	4	2	1	9	2
TI	0				22.02	49.92	37.9	male	22	1	3	4	4	2	1	9	2
TI	0				22.02	49.92	37.9	male	22	1	2	1	1	2	2	9	1
TI	0				22.02	49.92	37.9	male	22	1	2	2	1	2	2	9	1
TI	0				22.02	49.92	37.9	male	22	1	2	3	1	2	2	9	1
TI	0				22.02	49.92	37.9	male	22	1	2	4	1	2	2	9	1
TI	0				22.02	49.92	37.9	male	22	1	2	1	1	1	2	9	2
TI	0				22.02	49.92	37.9	male	22	1	2	2	1	1	2	9	2
TI	0				22.02	49.92	37.9	male	22	1	2	3	1	1	2	9	2
TI	0				22.02	49.92	37.9	male	22	1	2	4	1	1	2	9	2
TI	1	1	3	0	22.02	49.92	37.9	male	22	1	1	1	2	2	2	9	1
TI	1	1	3	0	22.02	49.92	37.9	male	22	1	1	2	2	2	2	9	1
TI	1	1	4	0	22.02	49.92	37.9	male	22	1	1	3	2	2	2	9	1
TI	1	1	4	0	22.02	49.92	37.9	male	22	1	1	4	2	2	2	9	1
TI	1	1	5	0	22.02	49.92	37.9	male	22	1	1	1	2	1	2	9	2
TI	1	1	6	0	22.02	49.92	37.9	male	22	1	1	2	2	1	2	9	2
TI	1	1	4	0	22.02	49.92	37.9	male	22	1	1	3	2	1	2	9	2
TI	1	1	4	0	22.02	49.92	37.9	male	22	1	1	4	2	1	2	9	2
TM	1	1	8	0	47.7	62.92	63.52	male	24	1	1	1	4	2	2	10	1
TM	1	1	10	0	47.7	62.92	63.52	male	24	1	1	2	4	2	2	10	1
TM	1	1	117	0	47.7	62.92	63.52	male	24	1	1	3	4	2	2	10	1
TM	1	1	15	0	47.7	62.92	63.52	male	24	1	1	4	4	2	2	10	1
TM	1	1	6	0	47.7	62.92	63.52	male	24	1	1	1	4	1	2	10	2
TM	1	1	4	0	47.7	62.92	63.52	male	24	1	1	2	4	1	2	10	2
TM	1	1	12	0	47.7	62.92	63.52	male	24	1	1	3	4	1	2	10	2
TM	1	1	4	0	47.7	62.92	63.52	male	24	1	1	4	4	1	2	10	2
TM	0				47.7	62.92	63.52	male	24	1	3	1	1	1	1	10	1
TM	0				47.7	62.92	63.52	male	24	1	3	2	1	1	1	10	1
TM	0				47.7	62.92	63.52	male	24	1	3	3	1	1	1	10	1
TM	0				47.7	62.92	63.52	male	24	1	3	4	1	1	1	10	1
TM	1	0		1	47.7	62.92	63.52	male	24	1	3	1	1	2	1	10	2
TM	1	1	22	0	47.7	62.92	63.52	male	24	1	3	2	1	2	1	10	2
TM	1	1	4	0	47.7	62.92	63.52	male	24	1	3	3	1	2	1	10	2
TM	1	1	4	0	47.7	62.92	63.52	male	24	1	3	4	1	2	1	10	2
TM	1	0		0	47.7	62.92	63.52	male	24	1	2	1	3	2	2	10	1
TM	1	1		0	47.7	62.92	63.52	male	24	1	2	2	3	2	2	10	1
TM	1	1	14	0	47.7	62.92	63.52	male	24	1	2	3	3	2	2	10	1
TM	1	1	12	0	47.7	62.92	63.52	male	24	1	2	4	3	2	2	10	1
TM	1	1	8	0	47.7	62.92	63.52	male	24	1	2	1	3	1	2	10	2
TM	1	1	7	0	47.7	62.92	63.52	male	24	1	2	2	3	1	2	10	2
TM	1	1	3	0	47.7	62.92	63.52	male	24	1	2	3	3	1	2	10	2
TM	1	1	9	0	47.7	62.92	63.52	male	24	1	2	4	3	1	2	10	2
TO	1	0		0	47.02	45.45	40.25	male	26	1	2	1	4	2	2	11	1
TO	1	1	10	0	47.02	45.45	40.25	male	26	1	2	2	4	2	2	11	1
TO	1	1	9	0	47.02	45.45	40.25	male	26	1	2	3	4	2	2	11	1
TO	1	1	14	0	47.02	45.45	40.25	male	26	1	2	4	4	2	2	11	1
TO	1	1	7	0	47.02	45.45	40.25	male	26	1	2	1	4	1	2	11	2
TO	1	1	8	0	47.02	45.45	40.25	male	26	1	2	2	4	1	2	11	2
TO	1	1	4	0	47.02	45.45	40.25	male	26	1	2	3	4	1	2	11	2
TO	1	1	3	0	47.02	45.45	40.25	male	26	1	2	4	4	1	2	11	2
TO	1	1	17	0	47.02	45.45	40.25	male	26	1	1	1	1	1	1	11	1
TO	1	1	6	0	47.02	45.45	40.25	male	26	1	1	2	1	1	1	11	1
TO	1	1	7	0	47.02	45.45	40.25	male	26	1	1	3	1	1	1	11	1
TO	1	1	5	0	47.02	45.45	40.25	male	26	1	1	4	1	1	1	11	1
TO	1	1	12	0	47.02	45.45	40.25	male	26	1	1	1	1	2	1	11	2
TO	1	1	7	0	47.02	45.45	40.25	male	26	1	1	2	1	2	1	11	2
TO	1	1	8	0	47.02	45.45	40.25	male	26	1	1	3	1	2	1	11	2
TO	1	1	5	0	47.02	45.45	40.25	male	26	1	1	4	1	2	1	11	2
TO	1	1	14	0	47.02	45.45	40.25	male	26	1	3	1	3	2	2	11	1
TO	1	0		1	47.02	45.45	40.25	male	26	1	3	2	3	2	2	11	1
TO	1	1	40	0	47.02	45.45	40.25	male	26	1	3	3	3	2	2	11	1
TO	1	1	7	0	47.02	45.45	40.25	male	26	1	3	4	3	2	2	11	1
TO	1	1	2	0	47.02	45.45	40.25	male	26	1	3	1	3	1	2	11	2
TO	1	1	4	0	47.02	45.45	40.25	male	26	1	3	2	3	1	2	11	2
TO	1	1	3	0	47.02	45.45	40.25	male	26	1	3	3	3	1	2	11	2
TO	1	1	2	0	47.02	45.45	40.25	male	26	1	3	4	3	1	2	11	2
VI	1	1	34	0	43.25	56.84	39.68	male	27	1	1	1	4	1	1	12	1
VI	1	1	9	0	43.25	56.84	39.68	male	27	1	1	2	4	1	1	12	1
VI	1	1	8	0	43.25	56.84	39.68	male	27	1	1	3	4	1	1	12	1
VI	1	1	2	0	43.25	56.84	39.68	male	27	1	1	4	4	1	1	12	1
VI	1	1	8	0	43.25	56.84	39.68	male	27	1	1	1	4	2	1	12	2
VI	1	1	3	0	43.25	56.84	39.68	male	27	1	1	2	4	2	1	12	2
VI	1	1	2	0	43.25	56.84	39.68	male	27	1	1	3	4	2	1	12	2
VI	1	1	3	0	43.25	56.84	39.68	male	27	1	1	4	4	2	1	12	2
VI	1	1	8	0	43.25	56.84	39.68	male	27	1	3	1	1	2	2	12	1
VI	1	1	5	0	43.25	56.84	39.68	male	27	1	3	2	1	2	2	12	1
VI	1	1	3	0	43.25	56.84	39.68	male	27	1	3	3	1	2	2	12	1
VI	1	1	4	0	43.25	56.84	39.68	male	27	1	3	4	1	2	2	12	1
VI	1	1	5	0	43.25	56.84	39.68	male	27	1	3	1	1	1	2	12	2
VI	1	1	1	0	43.25	56.84	39.68	male	27	1	3	2	1	1	2	12	2
VI	1	1	4	0	43.25	56.84	39.68	male	27	1	3	3	1	1	2	12	2
VI	1	1	4	0	43.25	56.84	39.68	male	27	1	3	4	1	1	2	12	2
VI	1	1	19	0	43.25	56.84	39.68	male	27	1	2	1	2	2	2	12	1
VI	1	1	3	0	43.25	56.84	39.68	male	27	1	2	2	2	2	2	12	1
VI	1	1	4	0	43.25	56.84	39.68	male	27	1	2	3	2	2	2	12	1
VI	1	1	3	0	43.25	56.84	39.68	male	27	1	2	4	2	2	2	12	1
VI	1	1	9	0	43.25	56.84	39.68	male	27	1	2	1	2	1	2	12	2
VI	1	1	4	0	43.25	56.84	39.68	male	27	1	2	2	2	1	2	12	2
VI	1	1	9	0	43.25	56.84	39.68	male	27	1	2	3	2	1	2	12	2
VI	1	1	4	0	43.25	56.84	39.68	male	27	1	2	4	2	1	2	12	2
WA	0				51.73	57.85	62.87	female	12	1	1	1	2	1	1	13	1
WA	0				51.73	57.85	62.87	female	12	1	1	2	2	1	1	13	1
WA	0				51.73	57.85	62.87	female	12	1	1	3	2	1	1	13	1
WA	0				51.73	57.85	62.87	female	12	1	1	4	2	1	1	13	1
WA	0				51.73	57.85	62.87	female	12	1	1	1	2	2	1	13	2
WA	0				51.73	57.85	62.87	female	12	1	1	2	2	2	1	13	2
WA	0				51.73	57.85	62.87	female	12	1	1	3	2	2	1	13	2
WA	0				51.73	57.85	62.87	female	12	1	1	4	2	2	1	13	2
WA	1	1	2	0	51.73	57.85	62.87	female	12	1	3	1	4	1	1	13	1
WA	1	1	2	0	51.73	57.85	62.87	female	12	1	3	2	4	1	1	13	1
WA	1	1	1	0	51.73	57.85	62.87	female	12	1	3	3	4	1	1	13	1
WA	1	1	2	0	51.73	57.85	62.87	female	12	1	3	4	4	1	1	13	1
WA	1	1	3	0	51.73	57.85	62.87	female	12	1	3	1	4	2	1	13	2
WA	1	1	7	0	51.73	57.85	62.87	female	12	1	3	2	4	2	1	13	2
WA	1	1	2	0	51.73	57.85	62.87	female	12	1	3	3	4	2	1	13	2
WA	1	1	2	0	51.73	57.85	62.87	female	12	1	3	4	4	2	1	13	2
WA	1	0		0	51.73	57.85	62.87	female	12	1	2	1	1	1	1	13	1
WA	1	0		1	51.73	57.85	62.87	female	12	1	2	2	1	1	1	13	1
WA	1	0		0	51.73	57.85	62.87	female	12	1	2	3	1	1	1	13	1
WA	1	0		0	51.73	57.85	62.87	female	12	1	2	4	1	1	1	13	1
WA	1	1	14	0	51.73	57.85	62.87	female	12	1	2	1	1	2	1	13	2
WA	1	1	3	0	51.73	57.85	62.87	female	12	1	2	2	1	2	1	13	2
WA	1	1	13	0	51.73	57.85	62.87	female	12	1	2	3	1	2	1	13	2
WA	1	1	4	0	51.73	57.85	62.87	female	12	1	2	4	1	2	1	13	2
AF	1	1	11	0	56.41	59.58	54.44	female	10	2	1	1	5	1	1	1	1
AF	1	1	9	0	56.41	59.58	54.44	female	10	2	1	2	5	1	1	1	1
AF	1	1	8	0	56.41	59.58	54.44	female	10	2	1	3	5	1	1	1	1
AF	1	1	4	0	56.41	59.58	54.44	female	10	2	1	4	5	1	1	1	1
AF	1	1	4	0	56.41	59.58	54.44	female	10	2	1	1	5	2	2	1	2
AF	1	1	6	0	56.41	59.58	54.44	female	10	2	1	2	5	2	2	1	2
AF	1	1	4	0	56.41	59.58	54.44	female	10	2	1	3	5	2	2	1	2
AF	1	1	5	0	56.41	59.58	54.44	female	10	2	1	4	5	2	2	1	2
AF	1	1	56	0	56.41	59.58	54.44	female	10	2	2	1	6	1	1	1	1
AF	1	1	56	0	56.41	59.58	54.44	female	10	2	2	2	6	1	1	1	1
AF	1	1	14	0	56.41	59.58	54.44	female	10	2	2	3	6	1	1	1	1
AF	1	1	17	0	56.41	59.58	54.44	female	10	2	2	4	6	1	1	1	1
AF	1	1	47	0	56.41	59.58	54.44	female	10	2	2	1	6	2	1	1	2
AF	1	1	11	0	56.41	59.58	54.44	female	10	2	2	2	6	2	1	1	2
AF	1	1	14	0	56.41	59.58	54.44	female	10	2	2	3	6	2	1	1	2
AF	1	1	15	0	56.41	59.58	54.44	female	10	2	2	4	6	2	1	1	2
AF	1	1	7	0	56.41	59.58	54.44	female	10	2	3	1	8	2	2	1	1
AF	1	1	6	0	56.41	59.58	54.44	female	10	2	3	2	8	2	2	1	1
AF	1	1	4	0	56.41	59.58	54.44	female	10	2	3	3	8	2	2	1	1
AF	1	1	8	0	56.41	59.58	54.44	female	10	2	3	4	8	2	2	1	1
AF	1	1	15	0	56.41	59.58	54.44	female	10	2	3	1	8	1	1	1	2
AF	1	1	3	0	56.41	59.58	54.44	female	10	2	3	2	8	1	1	1	2
AF	1	1	3	0	56.41	59.58	54.44	female	10	2	3	3	8	1	1	1	2
AF	1	1	46	0	56.41	59.58	54.44	female	10	2	3	4	8	1	1	1	2
BE	1	1	65	0	54.76	64.84	56.46	female	24	2	3	1	5	1	1	2	1
BE	1	1	7	0	54.76	64.84	56.46	female	24	2	3	2	5	1	1	2	1
BE	1	1	20	0	54.76	64.84	56.46	female	24	2	3	3	5	1	1	2	1
BE	1	1	8	0	54.76	64.84	56.46	female	24	2	3	4	5	1	1	2	1
BE	1	1	25	0	54.76	64.84	56.46	female	24	2	3	1	5	2	2	2	2
BE	1	1	3	0	54.76	64.84	56.46	female	24	2	3	2	5	2	2	2	2
BE	1	1	6	0	54.76	64.84	56.46	female	24	2	3	3	5	2	2	2	2
BE	1	1	5	0	54.76	64.84	56.46	female	24	2	3	4	5	2	2	2	2
BE	1	0		1	54.76	64.84	56.46	female	24	2	1	1	6	2	1	2	1
BE	1	0		1	54.76	64.84	56.46	female	24	2	1	2	6	2	1	2	1
BE	1	1	14	0	54.76	64.84	56.46	female	24	2	1	3	6	2	1	2	1
BE	1	0		1	54.76	64.84	56.46	female	24	2	1	4	6	2	1	2	1
BE	1	0		1	54.76	64.84	56.46	female	24	2	1	1	6	1	1	2	2
BE	1	1	22	0	54.76	64.84	56.46	female	24	2	1	2	6	1	1	2	2
BE	1	1	38	0	54.76	64.84	56.46	female	24	2	1	3	6	1	1	2	2
BE	1	1	29	0	54.76	64.84	56.46	female	24	2	1	4	6	1	1	2	2
BE	1	1	26	0	54.76	64.84	56.46	female	24	2	2	1	8	2	2	2	1
BE	1	1	17	0	54.76	64.84	56.46	female	24	2	2	2	8	2	2	2	1
BE	1	1	18	0	54.76	64.84	56.46	female	24	2	2	3	8	2	2	2	1
BE	1	1	8	0	54.76	64.84	56.46	female	24	2	2	4	8	2	2	2	1
BE	1	1	8	0	54.76	64.84	56.46	female	24	2	2	1	8	1	1	2	2
BE	1	1	6	0	54.76	64.84	56.46	female	24	2	2	2	8	1	1	2	2
BE	1	1	11	0	54.76	64.84	56.46	female	24	2	2	3	8	1	1	2	2
BE	1	1	11	0	54.76	64.84	56.46	female	24	2	2	4	8	1	1	2	2
BO	1	1	17	0	60.79	56.68	63.11	male	9	2	1	1	5	2	2	3	1
BO	1	1	11	0	60.79	56.68	63.11	male	9	2	1	2	5	2	2	3	1
BO	1	1	9	0	60.79	56.68	63.11	male	9	2	1	3	5	2	2	3	1
BO	1	1	58	0	60.79	56.68	63.11	male	9	2	1	4	5	2	2	3	1
BO	1	1	32	0	60.79	56.68	63.11	male	9	2	1	1	5	1	1	3	2
BO	1	1	6	0	60.79	56.68	63.11	male	9	2	1	2	5	1	1	3	2
BO	1	1	42	0	60.79	56.68	63.11	male	9	2	1	3	5	1	1	3	2
BO	1	1	4	0	60.79	56.68	63.11	male	9	2	1	4	5	1	1	3	2
BO	1	0		1	60.79	56.68	63.11	male	9	2	2	1	6	1	1	3	1
BO	1	0		1	60.79	56.68	63.11	male	9	2	2	2	6	1	1	3	1
BO	1	1	26	0	60.79	56.68	63.11	male	9	2	2	3	6	1	1	3	1
BO	1	1	15	0	60.79	56.68	63.11	male	9	2	2	4	6	1	1	3	1
BO	1	1	29	0	60.79	56.68	63.11	male	9	2	2	1	6	2	1	3	2
BO	1	1	21	0	60.79	56.68	63.11	male	9	2	2	2	6	2	1	3	2
BO	1	1	17	0	60.79	56.68	63.11	male	9	2	2	3	6	2	1	3	2
BO	1	1	15	0	60.79	56.68	63.11	male	9	2	2	4	6	2	1	3	2
BO	1	1	4	0	60.79	56.68	63.11	male	9	2	3	1	8	1	1	3	1
BO	1	1	6	0	60.79	56.68	63.11	male	9	2	3	2	8	1	1	3	1
BO	1	1	3	0	60.79	56.68	63.11	male	9	2	3	3	8	1	1	3	1
BO	1	1	3	0	60.79	56.68	63.11	male	9	2	3	4	8	1	1	3	1
BO	1	1	4	0	60.79	56.68	63.11	male	9	2	3	1	8	2	2	3	2
BO	1	1	4	0	60.79	56.68	63.11	male	9	2	3	2	8	2	2	3	2
BO	1	1	3	0	60.79	56.68	63.11	male	9	2	3	3	8	2	2	3	2
BO	1	1	5	0	60.79	56.68	63.11	male	9	2	3	4	8	2	2	3	2
CHA	1	1	5	0	53.16	42.47	49.81	male	20	2	2	1	5	2	2	4	1
CHA	1	1	5	0	53.16	42.47	49.81	male	20	2	2	2	5	2	2	4	1
CHA	1	1	30	0	53.16	42.47	49.81	male	20	2	2	3	5	2	2	4	1
CHA	1	1	5	0	53.16	42.47	49.81	male	20	2	2	4	5	2	2	4	1
CHA	1	1	5	0	53.16	42.47	49.81	male	20	2	2	1	5	1	1	4	2
CHA	1	1	9	0	53.16	42.47	49.81	male	20	2	2	2	5	1	1	4	2
CHA	1	1	7	0	53.16	42.47	49.81	male	20	2	2	3	5	1	1	4	2
CHA	1	1	6	0	53.16	42.47	49.81	male	20	2	2	4	5	1	1	4	2
CHA	1	1	8	0	53.16	42.47	49.81	male	20	2	3	1	6	1	1	4	1
CHA	1	1	54	0	53.16	42.47	49.81	male	20	2	3	2	6	1	1	4	1
CHA	1	1	20	0	53.16	42.47	49.81	male	20	2	3	3	6	1	1	4	1
CHA	1	1	25	0	53.16	42.47	49.81	male	20	2	3	4	6	1	1	4	1
CHA	1	1	23	0	53.16	42.47	49.81	male	20	2	3	1	6	2	1	4	2
CHA	1	1	14	0	53.16	42.47	49.81	male	20	2	3	2	6	2	1	4	2
CHA	1	1	18	0	53.16	42.47	49.81	male	20	2	3	3	6	2	1	4	2
CHA	1	1	12	0	53.16	42.47	49.81	male	20	2	3	4	6	2	1	4	2
CHA	1	1	33	0	53.16	42.47	49.81	male	20	2	1	1	7	1	1	4	1
CHA	1	1	31	0	53.16	42.47	49.81	male	20	2	1	2	7	1	1	4	1
CHA	1	1	56	0	53.16	42.47	49.81	male	20	2	1	3	7	1	1	4	1
CHA	1	1	37	0	53.16	42.47	49.81	male	20	2	1	4	7	1	1	4	1
CHA	1	1	33	0	53.16	42.47	49.81	male	20	2	1	1	7	2	1	4	2
CHA	1	1	30	0	53.16	42.47	49.81	male	20	2	1	2	7	2	1	4	2
CHA	1	1	30	0	53.16	42.47	49.81	male	20	2	1	3	7	2	1	4	2
CHA	1	1	12	0	53.16	42.47	49.81	male	20	2	1	4	7	2	1	4	2
CO	1	1	7	0	48.1	37.43	42.44	female	15	2	2	1	5	1	1	5	1
CO	1	1	4	0	48.1	37.43	42.44	female	15	2	2	2	5	1	1	5	1
CO	1	1	9	0	48.1	37.43	42.44	female	15	2	2	3	5	1	1	5	1
CO	1	1	10	0	48.1	37.43	42.44	female	15	2	2	4	5	1	1	5	1
CO	1	1	8	0	48.1	37.43	42.44	female	15	2	2	1	5	2	2	5	2
CO	1	1	7	0	48.1	37.43	42.44	female	15	2	2	2	5	2	2	5	2
CO	1	1	12	0	48.1	37.43	42.44	female	15	2	2	3	5	2	2	5	2
CO	1	1	8	0	48.1	37.43	42.44	female	15	2	2	4	5	2	2	5	2
CO	1	1	34	0	48.1	37.43	42.44	female	15	2	3	1	6	2	2	5	1
CO	1	1	40	0	48.1	37.43	42.44	female	15	2	3	2	6	2	2	5	1
CO	1	1	24	0	48.1	37.43	42.44	female	15	2	3	3	6	2	2	5	1
CO	1	1	50	0	48.1	37.43	42.44	female	15	2	3	4	6	2	2	5	1
CO	1	1	35	0	48.1	37.43	42.44	female	15	2	3	1	6	2	2	5	2
CO	1	1	16	0	48.1	37.43	42.44	female	15	2	3	2	6	2	2	5	2
CO	1	1	13	0	48.1	37.43	42.44	female	15	2	3	3	6	2	2	5	2
CO	1	1	21	0	48.1	37.43	42.44	female	15	2	3	4	6	2	2	5	2
CO	1	1	16	0	48.1	37.43	42.44	female	15	2	1	1	8	2	2	5	1
CO	1	1	9	0	48.1	37.43	42.44	female	15	2	1	2	8	2	2	5	1
CO	1	1	11	0	48.1	37.43	42.44	female	15	2	1	3	8	2	2	5	1
CO	1	1	8	0	48.1	37.43	42.44	female	15	2	1	4	8	2	2	5	1
CO	1	1	16	0	48.1	37.43	42.44	female	15	2	1	1	8	1	1	5	2
CO	1	1	6	0	48.1	37.43	42.44	female	15	2	1	2	8	1	1	5	2
CO	1	1	7	0	48.1	37.43	42.44	female	15	2	1	3	8	1	1	5	2
CO	1	1	4	0	48.1	37.43	42.44	female	15	2	1	4	8	1	1	5	2
JU	1	1	67	0	63.44	49.76	48.03	male	6	2	3	1	6	2	2	6	1
JU	1	1	24	0	63.44	49.76	48.03	male	6	2	3	2	6	2	2	6	1
JU	1	1	17	0	63.44	49.76	48.03	male	6	2	3	3	6	2	2	6	1
JU	1	1	30	0	63.44	49.76	48.03	male	6	2	3	4	6	2	2	6	1
JU	1	1	45	0	63.44	49.76	48.03	male	6	2	3	1	6	1	2	6	2
JU	1	1	29	0	63.44	49.76	48.03	male	6	2	3	2	6	1	2	6	2
JU	1	1	16	0	63.44	49.76	48.03	male	6	2	3	3	6	1	2	6	2
JU	1	1	16	0	63.44	49.76	48.03	male	6	2	3	4	6	1	2	6	2
JU	1	1	57	0	63.44	49.76	48.03	male	6	2	1	1	7	1	1	6	1
JU	1	1	103	0	63.44	49.76	48.03	male	6	2	1	2	7	1	1	6	1
JU	1	1	122	0	63.44	49.76	48.03	male	6	2	1	3	7	1	1	6	1
JU	1	1	31	0	63.44	49.76	48.03	male	6	2	1	4	7	1	1	6	1
JU	1	1	106	0	63.44	49.76	48.03	male	6	2	1	1	7	2	1	6	2
JU	1	1	165	0	63.44	49.76	48.03	male	6	2	1	2	7	2	1	6	2
JU	1	1	229	0	63.44	49.76	48.03	male	6	2	1	3	7	2	1	6	2
JU	1	1	25	0	63.44	49.76	48.03	male	6	2	1	4	7	2	1	6	2
JU	1	1	16	0	63.44	49.76	48.03	male	6	2	2	1	8	2	2	6	1
JU	1	1	11	0	63.44	49.76	48.03	male	6	2	2	2	8	2	2	6	1
JU	1	1	6	0	63.44	49.76	48.03	male	6	2	2	3	8	2	2	6	1
JU	1	1	14	0	63.44	49.76	48.03	male	6	2	2	4	8	2	2	6	1
JU	1	1	24	0	63.44	49.76	48.03	male	6	2	2	1	8	1	1	6	2
JU	1	1	12	0	63.44	49.76	48.03	male	6	2	2	2	8	1	1	6	2
JU	1	1	9	0	63.44	49.76	48.03	male	6	2	2	3	8	1	1	6	2
JU	1	1	13	0	63.44	49.76	48.03	male	6	2	2	4	8	1	1	6	2
MA	0				51.82	44.66	60.84	male	25	2	3	1				7
MA	0				51.82	44.66	60.84	male	25	2	3	2				7
MA	0				51.82	44.66	60.84	male	25	2	3	3				7
MA	0				51.82	44.66	60.84	male	25	2	3	4				7
MA	0				51.82	44.66	60.84	male	25	2	3	1				7
MA	0				51.82	44.66	60.84	male	25	2	3	2				7
MA	0				51.82	44.66	60.84	male	25	2	3	3				7
MA	0				51.82	44.66	60.84	male	25	2	3	4				7
MA	0				51.82	44.66	60.84	male	25	2	3	1				7
MA	0				51.82	44.66	60.84	male	25	2	2	2				7
MA	0				51.82	44.66	60.84	male	25	2	2	3				7
MA	0				51.82	44.66	60.84	male	25	2	2	4				7
MA	0				51.82	44.66	60.84	male	25	2	2	1				7
MA	0				51.82	44.66	60.84	male	25	2	2	2				7
MA	0				51.82	44.66	60.84	male	25	2	2	3				7
MA	0				51.82	44.66	60.84	male	25	2	2	4				7
MA	1	1	31	0	51.82	44.66	60.84	male	25	2	1	1	8	2	2	7	1
MA	1	1	42	0	51.82	44.66	60.84	male	25	2	1	2	8	2	2	7	1
MA	1	1	34	0	51.82	44.66	60.84	male	25	2	1	3	8	2	2	7	1
MA	1	1	18	0	51.82	44.66	60.84	male	25	2	1	4	8	2	2	7	1
MA	1	1	16	0	51.82	44.66	60.84	male	25	2	1	1	8	1	1	7	2
MA	1	1	12	0	51.82	44.66	60.84	male	25	2	1	2	8	1	1	7	2
MA	1	1	11	0	51.82	44.66	60.84	male	25	2	1	3	8	1	1	7	2
MA	1	1	3	0	51.82	44.66	60.84	male	25	2	1	4	8	1	1	7	2
NI	0				56.1	35.17	38.79	male	8	2	2	1	7	1	1	8	1
NI	0				56.1	35.17	38.79	male	8	2	2	2	7	1	1	8	1
NI	0				56.1	35.17	38.79	male	8	2	2	3	7	1	1	8	1
NI	0				56.1	35.17	38.79	male	8	2	2	4	7	1	1	8	1
NI	0				56.1	35.17	38.79	male	8	2	2	1	7	2	1	8	2
NI	0				56.1	35.17	38.79	male	8	2	2	2	7	2	1	8	2
NI	0				56.1	35.17	38.79	male	8	2	2	3	7	2	1	8	2
NI	0				56.1	35.17	38.79	male	8	2	2	4	7	2	1	8	2
NI	1	1	4	0	56.1	35.17	38.79	male	8	2	3	1	5	1	1	8	1
NI	1	1	5	0	56.1	35.17	38.79	male	8	2	3	2	5	1	1	8	1
NI	1	1	4	0	56.1	35.17	38.79	male	8	2	3	3	5	1	1	8	1
NI	1	1	3	0	56.1	35.17	38.79	male	8	2	3	4	5	1	1	8	1
NI	1	1	7	0	56.1	35.17	38.79	male	8	2	3	1	5	2	2	8	2
NI	1	1	5	0	56.1	35.17	38.79	male	8	2	3	2	5	2	2	8	2
NI	1	1	2	0	56.1	35.17	38.79	male	8	2	3	3	5	2	2	8	2
NI	1	1	3	0	56.1	35.17	38.79	male	8	2	3	4	5	2	2	8	2
NI	1	1	65	0	56.1	35.17	38.79	male	8	2	1	1	6	1	1	8	1
NI	1	1	10	0	56.1	35.17	38.79	male	8	2	1	2	6	1	1	8	1
NI	1	1	16	0	56.1	35.17	38.79	male	8	2	1	3	6	1	1	8	1
NI	1	1	74	0	56.1	35.17	38.79	male	8	2	1	4	6	1	1	8	1
NI	1	1	27	0	56.1	35.17	38.79	male	8	2	1	1	6	2	1	8	2
NI	1	1	11	0	56.1	35.17	38.79	male	8	2	1	2	6	2	1	8	2
NI	1	1	6	0	56.1	35.17	38.79	male	8	2	1	3	6	2	1	8	2
NI	1	1	12	0	56.1	35.17	38.79	male	8	2	1	4	6	2	1	8	2
TI	0				22.02	49.92	37.9	male	22	2	3	1				9
TI	0				22.02	49.92	37.9	male	22	2	3	2				9
TI	0				22.02	49.92	37.9	male	22	2	3	3				9
TI	0				22.02	49.92	37.9	male	22	2	3	4				9
TI	0				22.02	49.92	37.9	male	22	2	3	1				9
TI	0				22.02	49.92	37.9	male	22	2	3	2				9
TI	0				22.02	49.92	37.9	male	22	2	3	3				9
TI	0				22.02	49.92	37.9	male	22	2	3	4				9
TI	0				22.02	49.92	37.9	male	22	2	2	1				9
TI	0				22.02	49.92	37.9	male	22	2	2	2				9
TI	0				22.02	49.92	37.9	male	22	2	2	3				9
TI	0				22.02	49.92	37.9	male	22	2	2	4				9
TI	0				22.02	49.92	37.9	male	22	2	2	1				9
TI	0				22.02	49.92	37.9	male	22	2	2	2				9
TI	0				22.02	49.92	37.9	male	22	2	2	3				9
TI	0				22.02	49.92	37.9	male	22	2	2	4				9
TI	1	0		1	22.02	49.92	37.9	male	22	2	1	1	5	1	1	9	1
TI	1	1	8	0	22.02	49.92	37.9	male	22	2	1	2	5	1	1	9	1
TI	1	1	8	0	22.02	49.92	37.9	male	22	2	1	3	5	1	1	9	1
TI	1	1		0	22.02	49.92	37.9	male	22	2	1	4	5	1	1	9	1
TI	1	1	13	0	22.02	49.92	37.9	male	22	2	1	1	5	2	2	9	2
TI	1	1	10	0	22.02	49.92	37.9	male	22	2	1	2	5	2	2	9	2
TI	1	1	13	0	22.02	49.92	37.9	male	22	2	1	3	5	2	2	9	2
TI	1	1	16	0	22.02	49.92	37.9	male	22	2	1	4	5	2	2	9	2
TM	1	1	6	0	47.7	62.92	63.52	male	24	2	3	1	5	2	2	10	1
TM	1	1	8	0	47.7	62.92	63.52	male	24	2	3	2	5	2	2	10	1
TM	1	1	3	0	47.7	62.92	63.52	male	24	2	3	3	5	2	2	10	1
TM	1	1	8	0	47.7	62.92	63.52	male	24	2	3	4	5	2	2	10	1
TM	1	1	4	0	47.7	62.92	63.52	male	24	2	3	1	5	1	1	10	2
TM	1	1	4	0	47.7	62.92	63.52	male	24	2	3	2	5	1	1	10	2
TM	1	1	18	0	47.7	62.92	63.52	male	24	2	3	3	5	1	1	10	2
TM	1	1	8	0	47.7	62.92	63.52	male	24	2	3	4	5	1	1	10	2
TM	1	0		1	47.7	62.92	63.52	male	24	2	2	1	6	2	2	10	1
TM	1	1	150	0	47.7	62.92	63.52	male	24	2	2	2	6	2	2	10	1
TM	1	1	14	0	47.7	62.92	63.52	male	24	2	2	3	6	2	2	10	1
TM	1	0		1	47.7	62.92	63.52	male	24	2	2	4	6	2	2	10	1
TM	0				47.7	62.92	63.52	male	24	2	2	1	6	1	2	10	2
TM	0				47.7	62.92	63.52	male	24	2	2	2	6	1	2	10	2
TM	0				47.7	62.92	63.52	male	24	2	2	3	6	1	2	10	2
TM	0				47.7	62.92	63.52	male	24	2	2	4	6	1	2	10	2
TM	0				47.7	62.92	63.52	male	24	2	1	1	7	2	2	10	1
TM	0				47.7	62.92	63.52	male	24	2	1	2	7	2	2	10	1
TM	0				47.7	62.92	63.52	male	24	2	1	3	7	2	2	10	1
TM	0				47.7	62.92	63.52	male	24	2	1	4	7	2	2	10	1
TM	1	0		1	47.7	62.92	63.52	male	24	2	1	1	7	1	2	10	2
TM	1	0		1	47.7	62.92	63.52	male	24	2	1	2	7	1	2	10	2
TM	1	0		1	47.7	62.92	63.52	male	24	2	1	3	7	1	2	10	2
TM	1	1	20	0	47.7	62.92	63.52	male	24	2	1	4	7	1	2	10	2
TO	1	1	7	0	47.02	45.45	40.25	male	26	2	2	1	5	2	2	11	1
TO	1	1	11	0	47.02	45.45	40.25	male	26	2	2	2	5	2	2	11	1
TO	1	1	6	0	47.02	45.45	40.25	male	26	2	2	3	5	2	2	11	1
TO	1	1	11	0	47.02	45.45	40.25	male	26	2	2	4	5	2	2	11	1
TO	1	1	7	0	47.02	45.45	40.25	male	26	2	2	1	5	1	1	11	2
TO	1	1	9	0	47.02	45.45	40.25	male	26	2	2	2	5	1	1	11	2
TO	1	1	12	0	47.02	45.45	40.25	male	26	2	2	3	5	1	1	11	2
TO	1	1	14	0	47.02	45.45	40.25	male	26	2	2	4	5	1	1	11	2
TO	1	1	70	0	47.02	45.45	40.25	male	26	2	3	1	7	2	2	11	1
TO	1	1	56	0	47.02	45.45	40.25	male	26	2	3	2	7	2	2	11	1
TO	1	1	23	0	47.02	45.45	40.25	male	26	2	3	3	7	2	2	11	1
TO	1	1	24	0	47.02	45.45	40.25	male	26	2	3	4	7	2	2	11	1
TO	1	1	21	0	47.02	45.45	40.25	male	26	2	3	1	7	1	2	11	2
TO	1	1	26	0	47.02	45.45	40.25	male	26	2	3	2	7	1	2	11	2
TO	1	1	21	0	47.02	45.45	40.25	male	26	2	3	3	7	1	2	11	2
TO	1	1	30	0	47.02	45.45	40.25	male	26	2	3	4	7	1	2	11	2
TO	1	1	20	0	47.02	45.45	40.25	male	26	2	1	1	8	1	1	11	1
TO	1	1	15	0	47.02	45.45	40.25	male	26	2	1	2	8	1	1	11	1
TO	1	1	9	0	47.02	45.45	40.25	male	26	2	1	3	8	1	1	11	1
TO	1	1	3	0	47.02	45.45	40.25	male	26	2	1	4	8	1	1	11	1
TO	1	1	17	0	47.02	45.45	40.25	male	26	2	1	1	8	2	2	11	2
TO	1	1	15	0	47.02	45.45	40.25	male	26	2	1	2	8	2	2	11	2
TO	1	1	15	0	47.02	45.45	40.25	male	26	2	1	3	8	2	2	11	2
TO	1	1	9	0	47.02	45.45	40.25	male	26	2	1	4	8	2	2	11	2
VI	0				43.25	56.84	39.68	male	27	2	2	1	7	2	2	12	1
VI	0				43.25	56.84	39.68	male	27	2	2	2	7	2	2	12	1
VI	0				43.25	56.84	39.68	male	27	2	2	3	7	2	2	12	1
VI	0				43.25	56.84	39.68	male	27	2	2	4	7	2	2	12	1
VI	0				43.25	56.84	39.68	male	27	2	2	1	7	1	2	12	2
VI	0				43.25	56.84	39.68	male	27	2	2	2	7	1	2	12	2
VI	0				43.25	56.84	39.68	male	27	2	2	3	7	1	2	12	2
VI	0				43.25	56.84	39.68	male	27	2	2	4	7	1	2	12	2
VI	1	1	14	0	43.25	56.84	39.68	male	27	2	1	1	5	1	1	12	1
VI	1	1	5	0	43.25	56.84	39.68	male	27	2	1	2	5	1	1	12	1
VI	1	1	9	0	43.25	56.84	39.68	male	27	2	1	3	5	1	1	12	1
VI	1	1	4	0	43.25	56.84	39.68	male	27	2	1	4	5	1	1	12	1
VI	1	1	6	0	43.25	56.84	39.68	male	27	2	1	1	5	2	2	12	2
VI	1	1	6	0	43.25	56.84	39.68	male	27	2	1	2	5	2	2	12	2
VI	1	1	13	0	43.25	56.84	39.68	male	27	2	1	3	5	2	2	12	2
VI	1	1	8	0	43.25	56.84	39.68	male	27	2	1	4	5	2	2	12	2
VI	1	1	21	0	43.25	56.84	39.68	male	27	2	3	1	8	2	2	12	1
VI	1	1	19	0	43.25	56.84	39.68	male	27	2	3	2	8	2	2	12	1
VI	1	1	17	0	43.25	56.84	39.68	male	27	2	3	3	8	2	2	12	1
VI	1	1	10	0	43.25	56.84	39.68	male	27	2	3	4	8	2	2	12	1
VI	1	1	8	0	43.25	56.84	39.68	male	27	2	3	1	8	1	1	12	2
VI	1	1	10	0	43.25	56.84	39.68	male	27	2	3	2	8	1	1	12	2
VI	1	1	8	0	43.25	56.84	39.68	male	27	2	3	3	8	1	1	12	2
VI	1	1	6	0	43.25	56.84	39.68	male	27	2	3	4	8	1	1	12	2
WA	1	1	13	0	51.73	57.85	62.87	female	12	2	3	1	5	2	2	13	1
WA	1	1	17	0	51.73	57.85	62.87	female	12	2	3	2	5	2	2	13	1
WA	1	1	6	0	51.73	57.85	62.87	female	12	2	3	3	5	2	2	13	1
WA	1	1	4	0	51.73	57.85	62.87	female	12	2	3	4	5	2	2	13	1
WA	1	1	6	0	51.73	57.85	62.87	female	12	2	3	1	5	1	1	13	2
WA	1	1	6	0	51.73	57.85	62.87	female	12	2	3	2	5	1	1	13	2
WA	1	1	3	0	51.73	57.85	62.87	female	12	2	3	3	5	1	1	13	2
WA	1	1	3	0	51.73	57.85	62.87	female	12	2	3	4	5	1	1	13	2
WA	1	0		1	51.73	57.85	62.87	female	12	2	1	1	6	1	1	13	1
WA	1	0		1	51.73	57.85	62.87	female	12	2	1	2	6	1	1	13	1
WA	1	1	123	0	51.73	57.85	62.87	female	12	2	1	3	6	1	1	13	1
WA	1	1	174	0	51.73	57.85	62.87	female	12	2	1	4	6	1	1	13	1
WA	1	1	35	0	51.73	57.85	62.87	female	12	2	1	1	6	2	1	13	2
WA	1	1	13	0	51.73	57.85	62.87	female	12	2	1	2	6	2	1	13	2
WA	1	1	17	0	51.73	57.85	62.87	female	12	2	1	3	6	2	1	13	2
WA	1	1	20	0	51.73	57.85	62.87	female	12	2	1	4	6	2	1	13	2
WA	1	1	9	0	51.73	57.85	62.87	female	12	2	2	1	8	1	1	13	1
WA	1	1	6	0	51.73	57.85	62.87	female	12	2	2	2	8	1	1	13	1
WA	1	1	14	0	51.73	57.85	62.87	female	12	2	2	3	8	1	1	13	1
WA	1	1	8	0	51.73	57.85	62.87	female	12	2	2	4	8	1	1	13	1
WA	1	1	6	0	51.73	57.85	62.87	female	12	2	2	1	8	2	2	13	2
WA	1	1	3	0	51.73	57.85	62.87	female	12	2	2	2	8	2	2	13	2
WA	1	1	5	0	51.73	57.85	62.87	female	12	2	2	3	8	2	2	13	2
WA	1	1	4	0	51.73	57.85	62.87	female	12	2	2	4	8	2	2	13	2
AF	1	1	243	0	56.41	59.58	54.44	female	10	3	3	1	9	1	1	1	1
AF	1	1	236	0	56.41	59.58	54.44	female	10	3	3	2	9	1	1	1	1
AF	1	1	60	0	56.41	59.58	54.44	female	10	3	3	3	9	1	1	1	1
AF	1	1	162	0	56.41	59.58	54.44	female	10	3	3	4	9	1	1	1	1
AF	1	1	55	0	56.41	59.58	54.44	female	10	3	3	1	9	2	1	1	2
AF	1	1	71	0	56.41	59.58	54.44	female	10	3	3	2	9	2	1	1	2
AF	1	1	69	0	56.41	59.58	54.44	female	10	3	3	3	9	2	1	1	2
AF	1	1	145	0	56.41	59.58	54.44	female	10	3	3	4	9	2	1	1	2
AF	0				56.41	59.58	54.44	female	10	3	1	1	10	1	2	1	2
AF	0				56.41	59.58	54.44	female	10	3	1	2	10	1	2	1	2
AF	0				56.41	59.58	54.44	female	10	3	1	3	10	1	2	1	2
AF	0				56.41	59.58	54.44	female	10	3	1	4	10	1	2	1	2
AF	1	1	123	0	56.41	59.58	54.44	female	10	3	1	1	10	2	2	1	1
AF	1	1	237	0	56.41	59.58	54.44	female	10	3	1	2	10	2	2	1	1
AF	1	1	96	0	56.41	59.58	54.44	female	10	3	1	3	10	2	2	1	1
AF	1	1	52	0	56.41	59.58	54.44	female	10	3	1	4	10	2	2	1	1
AF	1	1	329	0	56.41	59.58	54.44	female	10	3	2	1	11	1	1	1	1
AF	1	1	124	0	56.41	59.58	54.44	female	10	3	2	2	11	1	1	1	1
AF	1	1	45	0	56.41	59.58	54.44	female	10	3	2	3	11	1	1	1	1
AF	1	1	48	0	56.41	59.58	54.44	female	10	3	2	4	11	1	1	1	1
AF	1	1	52	0	56.41	59.58	54.44	female	10	3	2	1	11	2	1	1	2
AF	1	1	41	0	56.41	59.58	54.44	female	10	3	2	2	11	2	1	1	2
AF	1	1	40	0	56.41	59.58	54.44	female	10	3	2	3	11	2	1	1	2
AF	1	1	77	0	56.41	59.58	54.44	female	10	3	2	4	11	2	1	1	2
BE	1	0		1	54.76	64.84	56.46	female	24	3	3	1	9	2	2	2	1
BE	1	0		1	54.76	64.84	56.46	female	24	3	3	2	9	2	2	2	1
BE	1	0		1	54.76	64.84	56.46	female	24	3	3	3	9	2	2	2	1
BE	1	0		1	54.76	64.84	56.46	female	24	3	3	4	9	2	2	2	1
BE	1	0		1	54.76	64.84	56.46	female	24	3	3	1	9	1	2	2	2
BE	1	0		1	54.76	64.84	56.46	female	24	3	3	2	9	1	2	2	2
BE	1	0		1	54.76	64.84	56.46	female	24	3	3	3	9	1	2	2	2
BE	0				54.76	64.84	56.46	female	24	3	3	4	9	1	2	2	2
BE	1	0		0	54.76	64.84	56.46	female	24	3	2	1	10	1	1	2	1
BE	1	0		0	54.76	64.84	56.46	female	24	3	2	2	10	1	1	2	1
BE	1	0		1	54.76	64.84	56.46	female	24	3	2	3	10	1	1	2	1
BE	1	0		1	54.76	64.84	56.46	female	24	3	2	4	10	1	1	2	1
BE	1	0		0	54.76	64.84	56.46	female	24	3	2	1	10	2	1	2	2
BE	1	0		1	54.76	64.84	56.46	female	24	3	2	2	10	2	1	2	2
BE	1	0		1	54.76	64.84	56.46	female	24	3	2	3	10	2	1	2	2
BE	0				54.76	64.84	56.46	female	24	3	2	4	10	2	1	2	2
BE	1	0		1	54.76	64.84	56.46	female	24	3	1	1	11	2	2	2	1
BE	1	0		1	54.76	64.84	56.46	female	24	3	1	2	11	2	2	2	1
BE	1	0		0	54.76	64.84	56.46	female	24	3	1	3	11	2	2	2	1
BE	0				54.76	64.84	56.46	female	24	3	1	4	11	2	2	2	1
BE	1	0		1	54.76	64.84	56.46	female	24	3	1	1	11	1	2	2	2
BE	1	0		1	54.76	64.84	56.46	female	24	3	1	2	11	1	2	2	2
BE	1	0		1	54.76	64.84	56.46	female	24	3	1	3	11	1	2	2	2
BE	0				54.76	64.84	56.46	female	24	3	1	4	11	1	2	2	2
BO	1	0		1	60.79	56.68	63.11	male	9	3	1	1	9	2	2	3	1
BO	1	0		1	60.79	56.68	63.11	male	9	3	1	2	9	2	2	3	1
BO	1	0		1	60.79	56.68	63.11	male	9	3	1	3	9	2	2	3	1
BO	1	0		1	60.79	56.68	63.11	male	9	3	1	4	9	2	2	3	1
BO	0				60.79	56.68	63.11	male	9	3	1	1	9	1	2	3	2
BO	0				60.79	56.68	63.11	male	9	3	1	2	9	1	2	3	2
BO	0				60.79	56.68	63.11	male	9	3	1	3	9	1	2	3	2
BO	0				60.79	56.68	63.11	male	9	3	1	4	9	1	2	3	2
BO	1	0		1	60.79	56.68	63.11	male	9	3	2	1	10	1	1	3	1
BO	1	0		1	60.79	56.68	63.11	male	9	3	2	2	10	1	1	3	1
BO	1	1	43	0	60.79	56.68	63.11	male	9	3	2	3	10	1	1	3	1
BO	1	1	47	0	60.79	56.68	63.11	male	9	3	2	4	10	1	1	3	1
BO	1	1	47	0	60.79	56.68	63.11	male	9	3	2	1	10	2	1	3	2
BO	1	1	50	0	60.79	56.68	63.11	male	9	3	2	2	10	2	1	3	2
BO	1	1	109	0	60.79	56.68	63.11	male	9	3	2	3	10	2	1	3	2
BO	1	1	63	0	60.79	56.68	63.11	male	9	3	2	4	10	2	1	3	2
BO	1	1	215	0	60.79	56.68	63.11	male	9	3	3	1	11	2	2	3	1
BO	1	0		1	60.79	56.68	63.11	male	9	3	3	2	11	2	2	3	1
BO	1	1	95	0	60.79	56.68	63.11	male	9	3	3	3	11	2	2	3	1
BO	1	1	197	0	60.79	56.68	63.11	male	9	3	3	4	11	2	2	3	1
BO	1	1	57	0	60.79	56.68	63.11	male	9	3	3	1	11	1	2	3	2
BO	1	1	76	0	60.79	56.68	63.11	male	9	3	3	2	11	1	2	3	2
BO	1	1	50	0	60.79	56.68	63.11	male	9	3	3	3	11	1	2	3	2
BO	1	1	33	0	60.79	56.68	63.11	male	9	3	3	4	11	1	2	3	2
CHA	1	1	195	0	53.16	42.47	49.81	male	20	3	1	1	9	1	2	4	1
CHA	1	1	198	0	53.16	42.47	49.81	male	20	3	1	2	9	1	2	4	1
CHA	1	1	178	0	53.16	42.47	49.81	male	20	3	1	3	9	1	2	4	1
CHA	1	1	202	0	53.16	42.47	49.81	male	20	3	1	4	9	1	2	4	1
CHA	1	1	177	0	53.16	42.47	49.81	male	20	3	1	1	9	2	2	4	2
CHA	1	1	136	0	53.16	42.47	49.81	male	20	3	1	2	9	2	2	4	2
CHA	1	1	147	0	53.16	42.47	49.81	male	20	3	1	3	9	2	2	4	2
CHA	1	1	145	0	53.16	42.47	49.81	male	20	3	1	4	9	2	2	4	2
CHA	1	1	156	0	53.16	42.47	49.81	male	20	3	3	1	10	1	1	4	1
CHA	1	1	52	0	53.16	42.47	49.81	male	20	3	3	2	10	1	1	4	1
CHA	0				53.16	42.47	49.81	male	20	3	3	3	10	1	1	4	1
CHA	1	1	67	0	53.16	42.47	49.81	male	20	3	3	4	10	1	1	4	1
CHA	1	1	125	0	53.16	42.47	49.81	male	20	3	3	1	10	2	1	4	2
CHA	1	1	176	0	53.16	42.47	49.81	male	20	3	3	2	10	2	1	4	2
CHA	1	1	44	0	53.16	42.47	49.81	male	20	3	3	3	10	2	1	4	2
CHA	0				53.16	42.47	49.81	male	20	3	3	4	10	2	1	4	2
CHA	1	1	101	0	53.16	42.47	49.81	male	20	3	2	1	11	1	1	4	1
CHA	1	1	182	0	53.16	42.47	49.81	male	20	3	2	2	11	1	1	4	1
CHA	1	1	120	0	53.16	42.47	49.81	male	20	3	2	3	11	1	1	4	1
CHA	1	1	66	0	53.16	42.47	49.81	male	20	3	2	4	11	1	1	4	1
CHA	1	1	40	0	53.16	42.47	49.81	male	20	3	2	1	11	2	1	4	2
CHA	1	1	50	0	53.16	42.47	49.81	male	20	3	2	2	11	2	1	4	2
CHA	1	1	37	0	53.16	42.47	49.81	male	20	3	2	3	11	2	1	4	2
CHA	1	1	112	0	53.16	42.47	49.81	male	20	3	2	4	11	2	1	4	2
CO	1	1	284	0	48.1	37.43	42.44	female	15	3	2	1	9	2	2	5	1
CO	1	1	65	0	48.1	37.43	42.44	female	15	3	2	2	9	2	2	5	1
CO	1	1	117	0	48.1	37.43	42.44	female	15	3	2	3	9	2	2	5	1
CO	1	1	76	0	48.1	37.43	42.44	female	15	3	2	4	9	2	2	5	1
CO	1	1	79	0	48.1	37.43	42.44	female	15	3	2	1	9	1	2	5	2
CO	1	1	34	0	48.1	37.43	42.44	female	15	3	2	2	9	1	2	5	2
CO	1	1	42	0	48.1	37.43	42.44	female	15	3	2	3	9	1	2	5	2
CO	1	1	61	0	48.1	37.43	42.44	female	15	3	2	4	9	1	2	5	2
CO	1	1	93	0	48.1	37.43	42.44	female	15	3	1	1	10	1	1	5	1
CO	1	1	50	0	48.1	37.43	42.44	female	15	3	1	2	10	1	1	5	1
CO	1	1	57	0	48.1	37.43	42.44	female	15	3	1	3	10	1	1	5	1
CO	1	1	67	0	48.1	37.43	42.44	female	15	3	1	4	10	1	1	5	1
CO	1	1	60	0	48.1	37.43	42.44	female	15	3	1	1	10	2	1	5	2
CO	1	0		0	48.1	37.43	42.44	female	15	3	1	2	10	2	1	5	2
CO	1	1	47	0	48.1	37.43	42.44	female	15	3	1	3	10	2	1	5	2
CO	1	1	50	0	48.1	37.43	42.44	female	15	3	1	4	10	2	1	5	2
CO	1	1	61	0	48.1	37.43	42.44	female	15	3	3	1	11	1	1	5	1
CO	1	1	85	0	48.1	37.43	42.44	female	15	3	3	2	11	1	1	5	1
CO	1	1	24	0	48.1	37.43	42.44	female	15	3	3	3	11	1	1	5	1
CO	1	1	38	0	48.1	37.43	42.44	female	15	3	3	4	11	1	1	5	1
CO	1	1	45	0	48.1	37.43	42.44	female	15	3	3	1	11	2	1	5	2
CO	1	1	31	0	48.1	37.43	42.44	female	15	3	3	2	11	2	1	5	2
CO	1	1	36	0	48.1	37.43	42.44	female	15	3	3	3	11	2	1	5	2
CO	1	1	27	0	48.1	37.43	42.44	female	15	3	3	4	11	2	1	5	2
JU	1	1	129	0	63.44	49.76	48.03	male	6	3	2	1	9	1	1	6	1
JU	1	1	112	0	63.44	49.76	48.03	male	6	3	2	2	9	1	1	6	1
JU	1	1	96	0	63.44	49.76	48.03	male	6	3	2	3	9	1	1	6	1
JU	1	1	59	0	63.44	49.76	48.03	male	6	3	2	4	9	1	1	6	1
JU	1	1	113	0	63.44	49.76	48.03	male	6	3	2	1	9	2	1	6	2
JU	1	1	84	0	63.44	49.76	48.03	male	6	3	2	2	9	2	1	6	2
JU	1	1	75	0	63.44	49.76	48.03	male	6	3	2	3	9	2	1	6	2
JU	1	1	108	0	63.44	49.76	48.03	male	6	3	2	4	9	2	1	6	2
JU	1	1	152	0	63.44	49.76	48.03	male	6	3	3	1	11	2	2	6	1
JU	1	1	135	0	63.44	49.76	48.03	male	6	3	3	2	11	2	2	6	1
JU	1	1	36	0	63.44	49.76	48.03	male	6	3	3	3	11	2	2	6	1
JU	1	1	76	0	63.44	49.76	48.03	male	6	3	3	4	11	2	2	6	1
JU	1	1	57	0	63.44	49.76	48.03	male	6	3	3	1	11	1	2	6	2
JU	1	1	62	0	63.44	49.76	48.03	male	6	3	3	2	11	1	2	6	2
JU	1	1	84	0	63.44	49.76	48.03	male	6	3	3	3	11	1	2	6	2
MA	0				51.82	44.66	60.84	male	25	3	2					7
MA	0				51.82	44.66	60.84	male	25	3	2					7
MA	0				51.82	44.66	60.84	male	25	3	2					7
MA	0				51.82	44.66	60.84	male	25	3	2					7
MA	0				51.82	44.66	60.84	male	25	3	2					7
MA	0				51.82	44.66	60.84	male	25	3	2					7
MA	0				51.82	44.66	60.84	male	25	3	2					7
MA	0				51.82	44.66	60.84	male	25	3	2					7
MA	0				51.82	44.66	60.84	male	25	3	1					7
MA	0				51.82	44.66	60.84	male	25	3	1					7
MA	0				51.82	44.66	60.84	male	25	3	1					7
MA	0				51.82	44.66	60.84	male	25	3	1					7
MA	0				51.82	44.66	60.84	male	25	3	1					7
MA	0				51.82	44.66	60.84	male	25	3	1					7
MA	0				51.82	44.66	60.84	male	25	3	1					7
MA	0				51.82	44.66	60.84	male	25	3	1					7
MA	0				51.82	44.66	60.84	male	25	3	3					7
MA	0				51.82	44.66	60.84	male	25	3	3					7
MA	0				51.82	44.66	60.84	male	25	3	3					7
MA	0				51.82	44.66	60.84	male	25	3	3					7
MA	0				51.82	44.66	60.84	male	25	3	3					7
MA	0				51.82	44.66	60.84	male	25	3	3					7
MA	0				51.82	44.66	60.84	male	25	3	3					7
MA	0				51.82	44.66	60.84	male	25	3	3					7
NI	0				56.1	35.17	38.79	male	8	3	2					8
NI	0				56.1	35.17	38.79	male	8	3	2					8
NI	0				56.1	35.17	38.79	male	8	3	2					8
NI	0				56.1	35.17	38.79	male	8	3	2					8
NI	0				56.1	35.17	38.79	male	8	3	2					8
NI	0				56.1	35.17	38.79	male	8	3	2					8
NI	0				56.1	35.17	38.79	male	8	3	2					8
NI	0				56.1	35.17	38.79	male	8	3	2					8
NI	0				56.1	35.17	38.79	male	8	3	1					8
NI	0				56.1	35.17	38.79	male	8	3	1					8
NI	0				56.1	35.17	38.79	male	8	3	1					8
NI	0				56.1	35.17	38.79	male	8	3	1					8
NI	0				56.1	35.17	38.79	male	8	3	1					8
NI	0				56.1	35.17	38.79	male	8	3	1					8
NI	0				56.1	35.17	38.79	male	8	3	1					8
NI	0				56.1	35.17	38.79	male	8	3	1					8
NI	0				56.1	35.17	38.79	male	8	3	3					8
NI	0				56.1	35.17	38.79	male	8	3	3					8
NI	0				56.1	35.17	38.79	male	8	3	3					8
NI	0				56.1	35.17	38.79	male	8	3	3					8
NI	0				56.1	35.17	38.79	male	8	3	3					8
NI	0				56.1	35.17	38.79	male	8	3	3					8
NI	0				56.1	35.17	38.79	male	8	3	3					8
NI	0				56.1	35.17	38.79	male	8	3	3					8
TI	1	0		1	22.02	49.92	37.9	male	22	3	1	1	10	1	1	9	1
TI	1	0		1	22.02	49.92	37.9	male	22	3	1	2	10	1	1	9	1
TI	0				22.02	49.92	37.9	male	22	3	1	3	10	1	1	9	1
TI	0				22.02	49.92	37.9	male	22	3	1	4	10	1	1	9	1
TI	1	0		1	22.02	49.92	37.9	male	22	3	1	1	10	2	1	9	2
TI	1	0		1	22.02	49.92	37.9	male	22	3	1	2	10	2	1	9	2
TI	1	0		1	22.02	49.92	37.9	male	22	3	1	3	10	2	1	9	2
TI	0				22.02	49.92	37.9	male	22	3	1	4	10	2	1	9	2
TI	0				22.02	49.92	37.9	male	22	3	2					9
TI	0				22.02	49.92	37.9	male	22	3	2					9
TI	0				22.02	49.92	37.9	male	22	3	2					9
TI	0				22.02	49.92	37.9	male	22	3	2					9
TI	0				22.02	49.92	37.9	male	22	3	2					9
TI	0				22.02	49.92	37.9	male	22	3	2					9
TI	0				22.02	49.92	37.9	male	22	3	2					9
TI	0				22.02	49.92	37.9	male	22	3	3					9
TI	0				22.02	49.92	37.9	male	22	3	3					9
TI	0				22.02	49.92	37.9	male	22	3	3					9
TI	0				22.02	49.92	37.9	male	22	3	3					9
TI	0				22.02	49.92	37.9	male	22	3	3					9
TI	0				22.02	49.92	37.9	male	22	3	3					9
TI	0				22.02	49.92	37.9	male	22	3	3					9
TI	0				22.02	49.92	37.9	male	22	3	3					9
TI	0				22.02	49.92	37.9	male	22	3	3					9
TM	1	1	117	0	47.7	62.92	63.52	male	24	3	2	1	10	2	2	10	1
TM	1	1	58	0	47.7	62.92	63.52	male	24	3	2	2	10	2	2	10	1
TM	1	1	80	0	47.7	62.92	63.52	male	24	3	2	3	10	2	2	10	1
TM	1	1	37	0	47.7	62.92	63.52	male	24	3	2	4	10	2	2	10	1
TM	1	1	155	0	47.7	62.92	63.52	male	24	3	2	1	10	1	2	10	2
TM	1	1	54	0	47.7	62.92	63.52	male	24	3	2	2	10	1	2	10	2
TM	1	1	40	0	47.7	62.92	63.52	male	24	3	2	3	10	1	2	10	2
TM	1	1	52	0	47.7	62.92	63.52	male	24	3	2	4	10	1	2	10	2
TM	1	1	113	0	47.7	62.92	63.52	male	24	3	3	1	11	1	1	10	1
TM	1	1	97	0	47.7	62.92	63.52	male	24	3	3	2	11	1	1	10	1
TM	1	1	64	0	47.7	62.92	63.52	male	24	3	3	3	11	1	1	10	1
TM	0				47.7	62.92	63.52	male	24	3	3	4	11	1	1	11	1
TM	1	1	86	0	47.7	62.92	63.52	male	24	3	3	1	11	2	1	10	2
TM	1	1	122	0	47.7	62.92	63.52	male	24	3	3	2	11	2	1	10	2
TM	1	1	104	0	47.7	62.92	63.52	male	24	3	3	2	11	2	1	10	2
TM	0				47.7	62.92	63.52	male	24	3	3	4	11	2	1	11	2
TO	1	0		0	47.02	45.45	40.25	male	26	3	1	1	9	1	1	11	1
TO	1	0		0	47.02	45.45	40.25	male	26	3	1	2	9	1	1	11	1
TO	1	1	147	0	47.02	45.45	40.25	male	26	3	1	3	9	1	1	11	1
TO	1	1	170	0	47.02	45.45	40.25	male	26	3	1	4	9	1	1	11	1
TO	1	1	163	0	47.02	45.45	40.25	male	26	3	1	1	9	2	1	11	2
TO	1	1	54	0	47.02	45.45	40.25	male	26	3	1	2	9	2	1	11	2
TO	1	1	76	0	47.02	45.45	40.25	male	26	3	1	3	9	2	1	11	2
TO	1	1	118	0	47.02	45.45	40.25	male	26	3	1	4	9	2	1	11	2
TO	1	1	348	0	47.02	45.45	40.25	male	26	3	3	1	10	1	1	11	1
TO	1	1	200	0	47.02	45.45	40.25	male	26	3	3	2	10	1	1	11	1
TO	1	1	235	0	47.02	45.45	40.25	male	26	3	3	3	10	1	1	11	1
TO	1	1	222	0	47.02	45.45	40.25	male	26	3	3	4	10	1	1	11	1
TO	1	1	117	0	47.02	45.45	40.25	male	26	3	3	1	10	2	1	11	2
TO	1	1	126	0	47.02	45.45	40.25	male	26	3	3	2	10	2	1	11	2
TO	1	1	138	0	47.02	45.45	40.25	male	26	3	3	3	10	2	1	11	2
TO	1	1	60	0	47.02	45.45	40.25	male	26	3	3	4	10	2	1	11	2
TO	1	0		0	47.02	45.45	40.25	male	26	3	2	1	11	2	2	11	1
TO	1	0		1	47.02	45.45	40.25	male	26	3	2	2	11	2	2	11	1
TO	1	1	63	0	47.02	45.45	40.25	male	26	3	2	3	11	2	2	11	1
TO	1	1	96	0	47.02	45.45	40.25	male	26	3	2	4	11	2	2	11	1
TO	1	1	63	0	47.02	45.45	40.25	male	26	3	2	1	11	1	2	11	2
TO	1	1	52	0	47.02	45.45	40.25	male	26	3	2	2	11	1	2	11	2
TO	1	1	68	0	47.02	45.45	40.25	male	26	3	2	3	11	1	2	11	2
TO	1	1	45	0	47.02	45.45	40.25	male	26	3	2	4	11	1	2	11	2
VI	1	0		0	43.25	56.84	39.68	male	27	3	3	1	9	1	1	12	1
VI	1	1	71	0	43.25	56.84	39.68	male	27	3	3	2	9	1	1	12	1
VI	1	1	40	0	43.25	56.84	39.68	male	27	3	3	3	9	1	1	12	1
VI	1	1	59	0	43.25	56.84	39.68	male	27	3	3	4	9	1	1	12	1
VI	1	1	176	0	43.25	56.84	39.68	male	27	3	3	1	9	2	1	12	2
VI	1	1	111	0	43.25	56.84	39.68	male	27	3	3	2	9	2	1	12	2
VI	1	1	99	0	43.25	56.84	39.68	male	27	3	3	3	9	2	1	12	2
VI	1	1	53	0	43.25	56.84	39.68	male	27	3	3	4	9	2	1	12	2
VI	1	0		1	43.25	56.84	39.68	male	27	3	2	1	10	2	2	12	1
VI	1	1	292	0	43.25	56.84	39.68	male	27	3	2	2	10	2	2	12	1
VI	1	1	65	0	43.25	56.84	39.68	male	27	3	2	3	10	2	2	12	1
VI	1	1	45	0	43.25	56.84	39.68	male	27	3	2	4	10	2	2	12	1
VI	1	1	57	0	43.25	56.84	39.68	male	27	3	2	1	10	1	2	12	2
VI	1	1	66	0	43.25	56.84	39.68	male	27	3	2	2	10	1	2	12	2
VI	1	1	30	0	43.25	56.84	39.68	male	27	3	2	3	10	1	2	12	2
VI	1	1	53	0	43.25	56.84	39.68	male	27	3	2	4	10	1	2	12	2
VI	1	1	121	0	43.25	56.84	39.68	male	27	3	1	1	11	1	1	12	1
VI	1	1	45	0	43.25	56.84	39.68	male	27	3	1	2	11	1	1	12	1
VI	1	1	53	0	43.25	56.84	39.68	male	27	3	1	3	11	1	1	12	1
VI	1	1	78	0	43.25	56.84	39.68	male	27	3	1	4	11	1	1	12	1
VI	1	1	24	0	43.25	56.84	39.68	male	27	3	1	1	11	2	1	12	2
VI	1	1	40	0	43.25	56.84	39.68	male	27	3	1	2	11	2	1	12	2
VI	1	1	47	0	43.25	56.84	39.68	male	27	3	1	3	11	2	1	12	2
VI	1	1	25	0	43.25	56.84	39.68	male	27	3	1	4	11	2	1	12	2
WA	1	1	215	0	51.73	57.85	62.87	female	12	3	2	1	9	2	2	13	1
WA	1	1	191	0	51.73	57.85	62.87	female	12	3	2	2	9	2	2	13	1
WA	1	1	181	0	51.73	57.85	62.87	female	12	3	2	3	9	2	2	13	1
WA	1	1	101	0	51.73	57.85	62.87	female	12	3	2	4	9	2	2	13	1
WA	1	1	164	0	51.73	57.85	62.87	female	12	3	2	1	9	1	2	13	2
WA	1	1	74	0	51.73	57.85	62.87	female	12	3	2	2	9	1	2	13	2
WA	1	1	66	0	51.73	57.85	62.87	female	12	3	2	3	9	1	2	13	2
WA	1	1	48	0	51.73	57.85	62.87	female	12	3	2	4	9	1	2	13	2
WA	1	1	77	0	51.73	57.85	62.87	female	12	3	3	1	10	2	2	13	1
WA	1	1	35	0	51.73	57.85	62.87	female	12	3	3	2	10	2	2	13	1
WA	1	1	271	0	51.73	57.85	62.87	female	12	3	3	3	10	2	2	13	1
WA	1	1	36	0	51.73	57.85	62.87	female	12	3	3	4	10	2	2	13	1
WA	1	1	45	0	51.73	57.85	62.87	female	12	3	3	1	10	1	2	13	2
WA	1	1	30	0	51.73	57.85	62.87	female	12	3	3	2	10	1	2	13	2
WA	1	1	20	0	51.73	57.85	62.87	female	12	3	3	3	10	1	2	13	2
WA	1	1	15	0	51.73	57.85	62.87	female	12	3	3	4	10	1	2	13	2
WA	1	1	46	0	51.73	57.85	62.87	female	12	3	1	1	11	1	1	13	1
WA	1	1	27	0	51.73	57.85	62.87	female	12	3	1	2	11	1	1	13	1
WA	1	1	40	0	51.73	57.85	62.87	female	12	3	1	3	11	1	1	13	1
WA	1	1	29	0	51.73	57.85	62.87	female	12	3	1	4	11	1	1	13	1
WA	1	1	48	0	51.73	57.85	62.87	female	12	3	1	1	11	2	1	13	2
WA	0				51.73	57.85	62.87	female	12	3	1	2	11	2	1	13	2
WA	1	1	68	0	51.73	57.85	62.87	female	12	3	1	3	11	2	1	13	2
WA	1	1	41	0	51.73	57.85	62.87	female	12	3	1	4	11	2	1	13	2

## Sheet: Legend cognitive tasks
subjects		sex		boxcolor		boxorder		session		tasks		ccomplexity		information		participation		freqdrop	freqdrop
AFRICA	1	MALE	1	TRANSPARENT	1	transp-opaque	1	first	1	SIMPLE		SIMPLE	1	LB	1	YES	1	YES	1
BEA	2	FEMALE	2	OPAQUE	2	opaque-transp	2	second	2	MT	1	INTERMEDIATE	2	SR	2	NO	0	NO	0
BONGO	3							third	3	OB	2	COMPLEX	3	DC	3
CHARLY	4							fourth	4	TC	3
COCO	5									WT	4
JUAN	6									INTERMEDIATE
MARCO	7									AT	5
NICO	8									FB	6
TICO	9									PB	7
TOM	10									TW	8
TONI	11									COMPLEX
VICTOR	12									CA	9
WATY	13									CF	10
CHEETA	14									CM	11
