# Supplementary material for: Personality, cognition and behavior in chimpanzees: a new approach based on Eysenck’s model
Source: PeerJ journal article supplement (doi:10.7717/peerj.9707), 2020-08-17
Supplement: Figure_S1.pdf [file Figure_S1.pdf]

**SIMPLE TASKS**

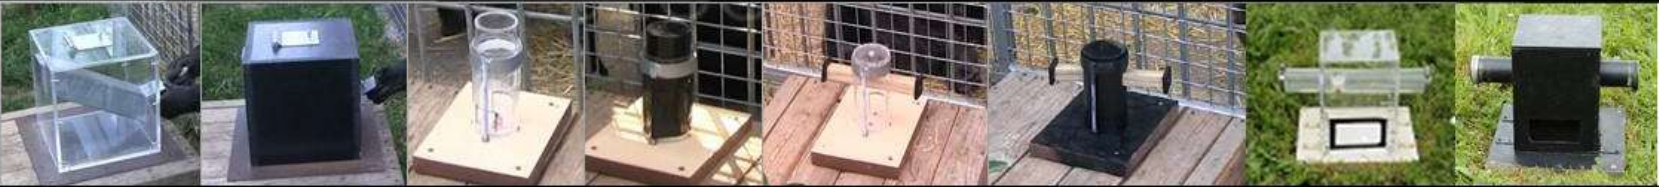

Open Box

Moveable Tube

Windows Task

Tube Cube

**INTERMEDIATE TASKS**

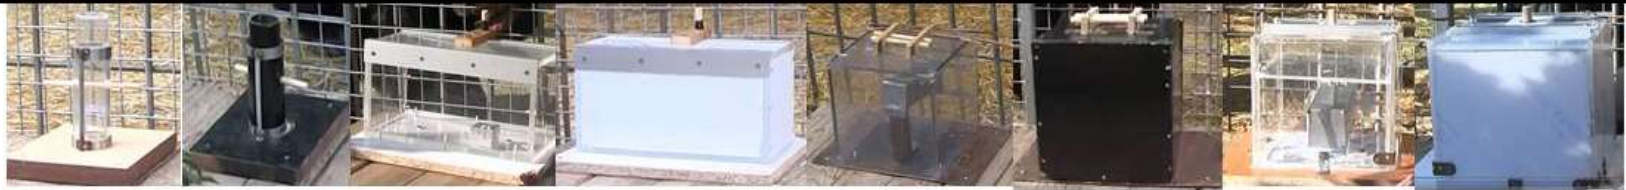

Tower Task

Artificial Fruit

Food Box

Push Box

**COMPLEX TASKS**

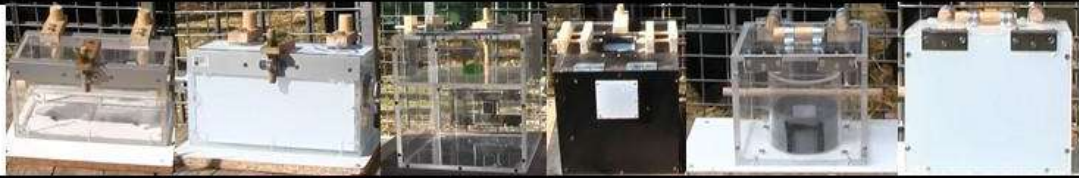

Complex Food Box

Complex Fixed Tube

Complex Artificial Fruit
